# Supplementary material
Source: PubMed Central journal article supplement (PMC4958145)
Supplement: AAC.00107-16_zac007165332so1.pdf [file AAC.00107-16_zac007165332so1.pdf]

**Supplemental Table S1. Countries participating in a global surveillance study in 2012-2014.**

| Region             | Country                | Years of participation <sup>a</sup> |      |                 |
|--------------------|------------------------|-------------------------------------|------|-----------------|
|                    |                        | 2012                                | 2013 | 2014            |
| Europe             | Austria                | X                                   | X    | X               |
|                    | Belgium                | X                                   | X    | X               |
|                    | Czech Republic         | X                                   | X    | X               |
|                    | Denmark                | X                                   | X    | X               |
|                    | France                 | X                                   | X    | X               |
|                    | Germany                | X                                   | X    | X               |
|                    | Greece                 | X                                   | X    | X               |
|                    | Hungary                | X                                   | X    | X               |
|                    | Ireland                | --                                  | X    | --              |
|                    | Italy                  | X                                   | X    | X               |
|                    | Netherlands            | X                                   | X    | X               |
|                    | Poland                 | --                                  | X    | X               |
|                    | Portugal               | X                                   | X    | X               |
|                    | Romania                | X                                   | X    | X               |
|                    | Russia                 | X                                   | X    | X               |
|                    | Spain                  | X                                   | X    | X               |
|                    | Sweden                 | X                                   | X    | X               |
| Turkey             | X                      | X                                   | X    |                 |
| United Kingdom     | X                      | X                                   | X    |                 |
| Latin America      | Argentina              | X                                   | X    | X               |
|                    | Brazil                 | X                                   | X    | X               |
|                    | Chile                  | X                                   | X    | X               |
|                    | Colombia               | X                                   | X    | X               |
|                    | Mexico                 | X                                   | X    | X               |
|                    | Venezuela              | X                                   | X    | X               |
| North America      | United States          | X                                   | X    | X               |
| Asia-Pacific       | Australia              | X                                   | X    | X               |
|                    | Mainland China         | X                                   | X    | NA <sup>b</sup> |
|                    | Hong Kong <sup>c</sup> | X                                   | X    | X               |
|                    | Japan                  | X                                   | X    | X               |
|                    | Korea, South           | X                                   | X    | X               |
|                    | Malaysia               | --                                  | X    | X               |
|                    | Philippines            | X                                   | X    | X               |
|                    | Taiwan                 | X                                   | X    | X               |
|                    | Thailand               | X                                   | X    | X               |
| Middle East-Africa | Israel                 | X                                   | X    | X               |
|                    | Kenya                  | --                                  | X    | X               |
|                    | Kuwait                 | X                                   | X    | X               |
|                    | Nigeria                | --                                  | X    | X               |
|                    | South Africa           | X                                   | X    | X               |

<sup>a</sup> "X" denotes participation during the indicated year. "--" denotes no participation during the indicated year.

<sup>b</sup>"NA", isolates were collected from patients but were not available due to export restrictions.

<sup>c</sup> Isolates were obtained from patients in Hong Kong during all three years of the study. It is listed separately from mainland China for this reason.
